# Supplementary material
Source: HighWire-hosted journal article supplement (http://ajnr-stage2.highwire.org/highwire/filestream/93750/field_highwire_adjunct_files/0/1753.pdf)
Supplement: 1753.pdf [file 1753.pdf]

**Online Table: Table of participant characteristics**

| Subject ID | Age | Gender type | ASIA Impairment Scale | Hospital Admittance to Scan Time (hrs) | SCI Etiology            | Lesion Length (cm) | Hemorrhage Length (cm) | %Δ fADC | %Δ AD  |
|------------|-----|-------------|-----------------------|----------------------------------------|-------------------------|--------------------|------------------------|---------|--------|
| 1          | 72  | Male        | A                     | 2.25                                   | Fall/Jump               | 4.79               | 1.59                   | -89.02  | -18.86 |
| 2          | 56  | Female      | B                     | 4.5                                    | Bicycle Accident        | 4.54               | NA                     | -35.64  | -27.98 |
| 3          | 44  | Male        | B                     | 3.3                                    | Motor Vehicle Collision | 9.63               | NA                     | -10.71  | -2.56  |
| 4          | 69  | Male        | Not Completed         | 2.75                                   | Motor Vehicle Collision | 4.34               | NA                     | -67.34  | 0.98   |
| 5          | 48  | Male        | A                     | 2.5                                    | Fall/Jump               | 4.2                | 1.17                   | -15.6   | -21.84 |
| 6          | 29  | Male        | Not Completed         | 12                                     | Motor Cycle Accident    | 8.06               | NA                     | -13.48  | -9.59  |
| 7          | 47  | Male        | Not Completed         | 3.75                                   | Fall/Jump               | 2.15               | NA                     | -47.65  | -38.36 |
| 8          | 52  | Male        | C                     | 6.25                                   | Motor Vehicle Collision | 3.02               | NA                     | -15.5   | -23.22 |

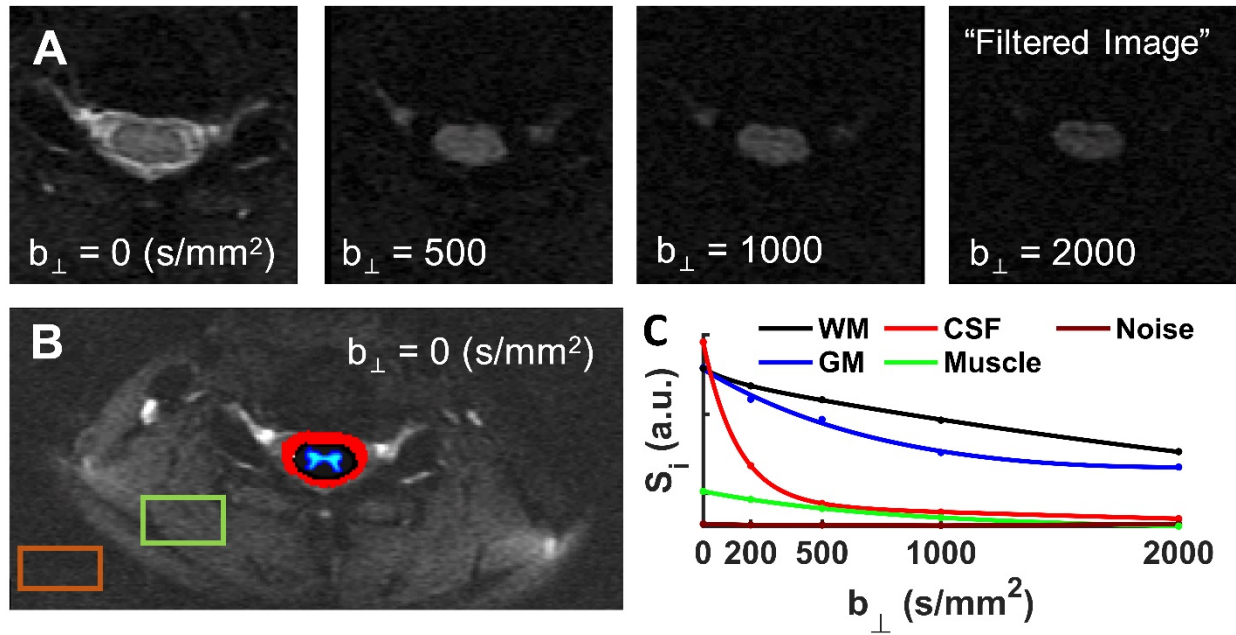

**Online Figure 1. Signal Characteristics of Single-Axis PGSE Perpendicular to the Human Spinal Cord.** Signal decay in a standard PGSE sequence was acquired with gradients directed perpendicular to the spinal cord in healthy individuals. Regions of interest (B) from the white matter (WM-black), gray matter (GM-blue), cerebrospinal fluid (CSF-red), muscle (green), and noise (brown) demonstrate the signal behavior from a perpendicular diffusion weighting,  $b_{\perp}$  (C). As demonstrated in the images (A) and verified by modeling the signal intensity at each region of interest as a biexponential decay (C) for increasing  $b_{\perp}$ -values (0 to 2000 s/mm<sup>2</sup>), perpendicular diffusion gradients attenuate the GM signal, and nearly completely suppress CSF and muscle signal, with less attenuation to the WM signal.

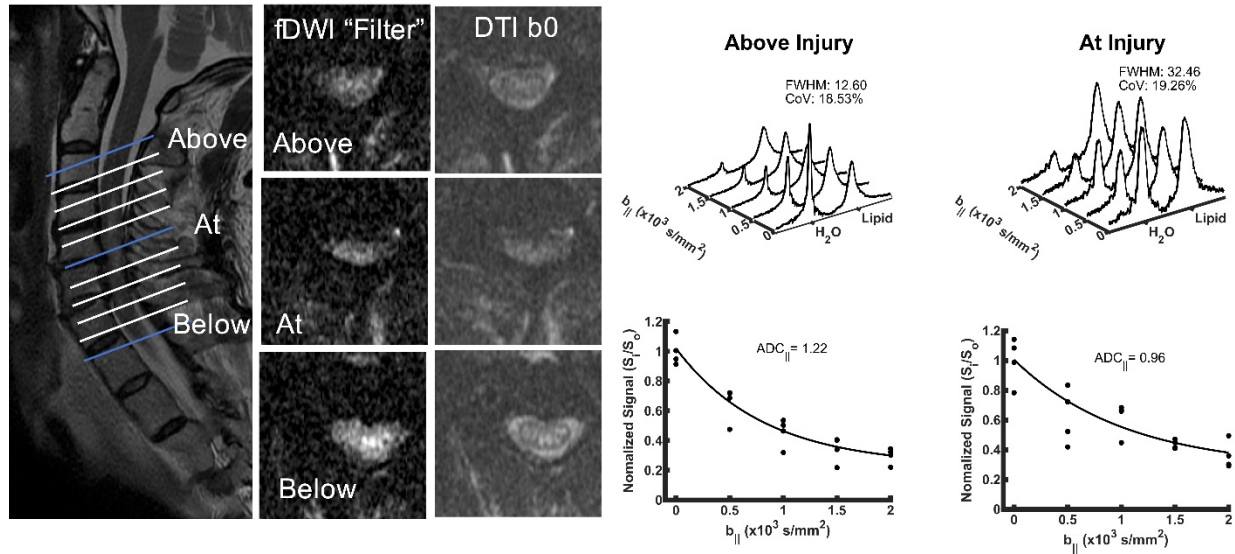

**Online Figure 2. Low image quality but acceptable spectral quality for an individual with acute spinal cord injury.** Water peaks are shown within the spectral data, and a bi-exponential fitted to the normalized data provides the ADC<sub>||</sub> at the injury site despite low image quality on a 1.5T MR.

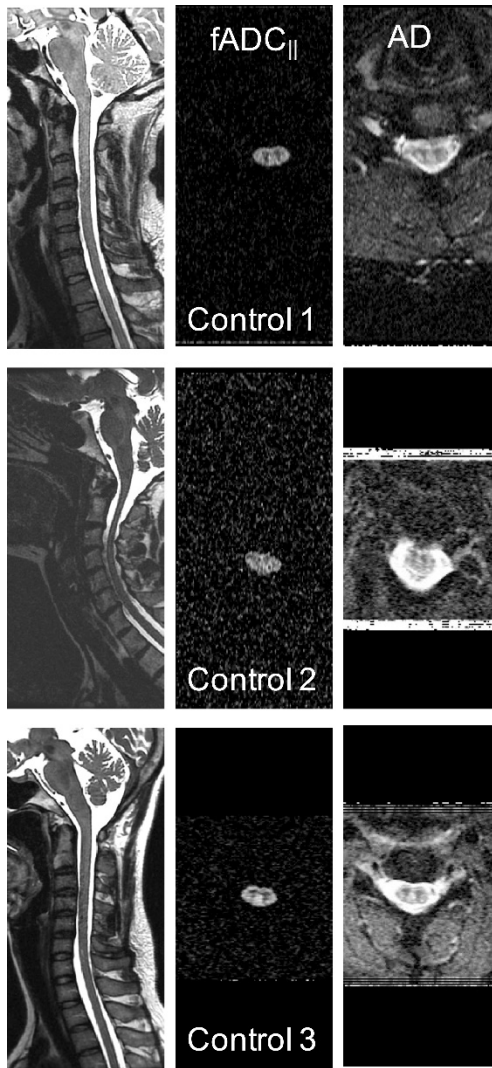

**Online Figure 3. Sagittal T2w and axial diffusivity maps for each healthy control.**

The images compare the fADC<sub>||</sub> and AD maps for each individual SCI participant, illustrating the removal of extra-axonal signals with the fDWI scheme on a 3T magnet and no SCI.

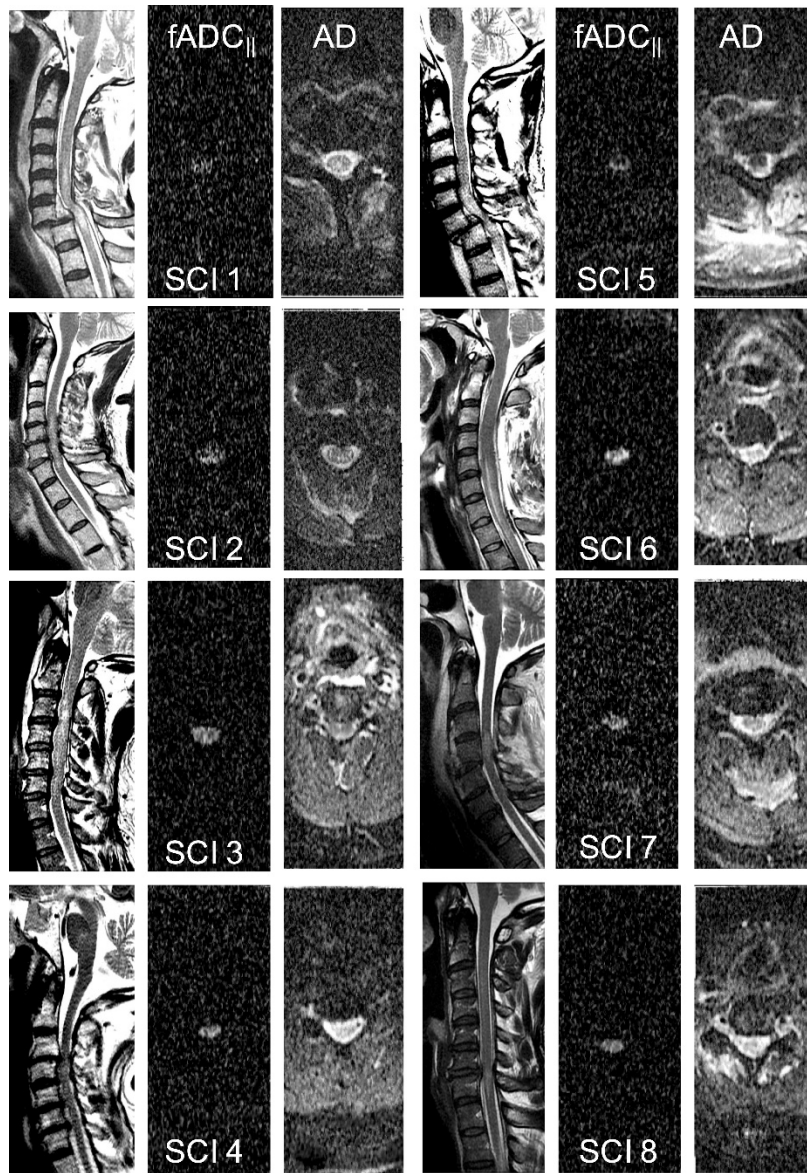

**Online Figure 4. Sagittal T2w and axial diffusivity maps for each SCI patient.** The images compare the  $fADC_{||}$  and AD maps for each individual SCI participant, illustrating the removal of extra-axonal signals with the fDWI scheme on 1.5T magnet and a spinal cord injury.
